# Supplementary material for: Spatial Relationship between Land Use Patterns and Ecosystem Services Value—Case Study of Nanjing
Source: MDPI journal article supplement (doi:10.3390/land11081168), 2022-07-27
Supplement: s1 [file s1]

## Supplementary Materials:

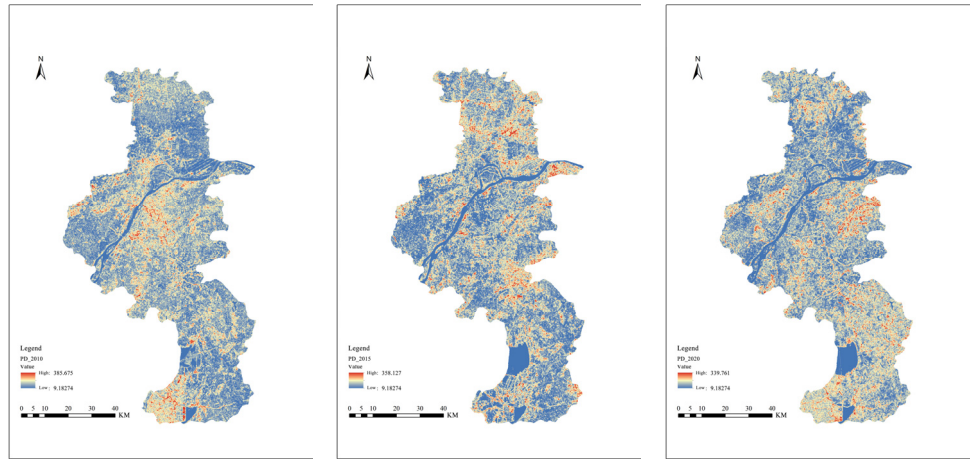

(a)

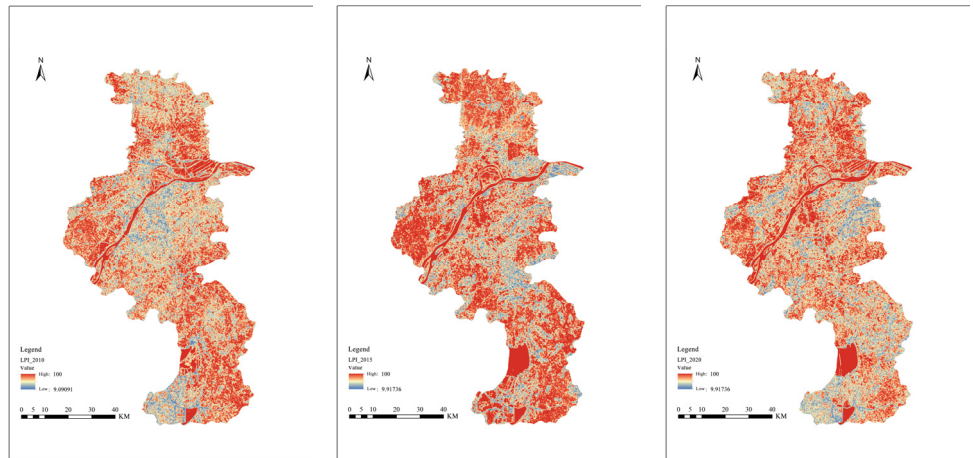

(b)

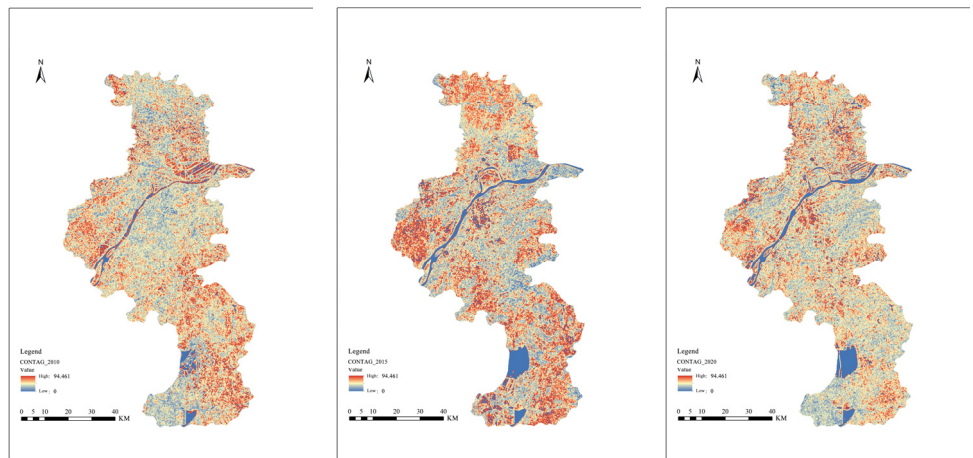

(c)

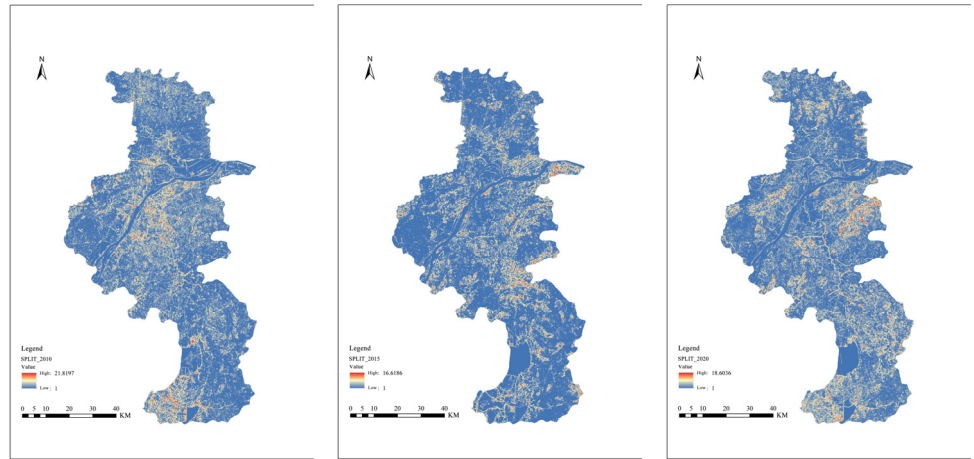

(d)

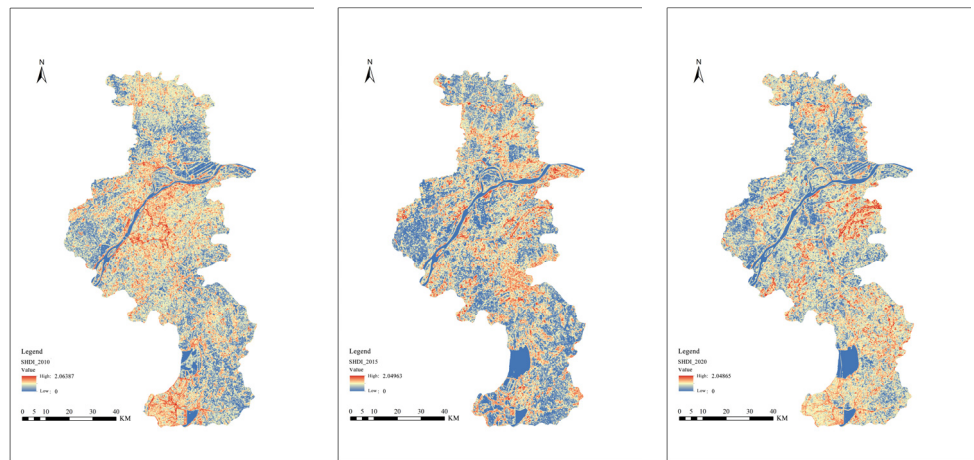

(e)

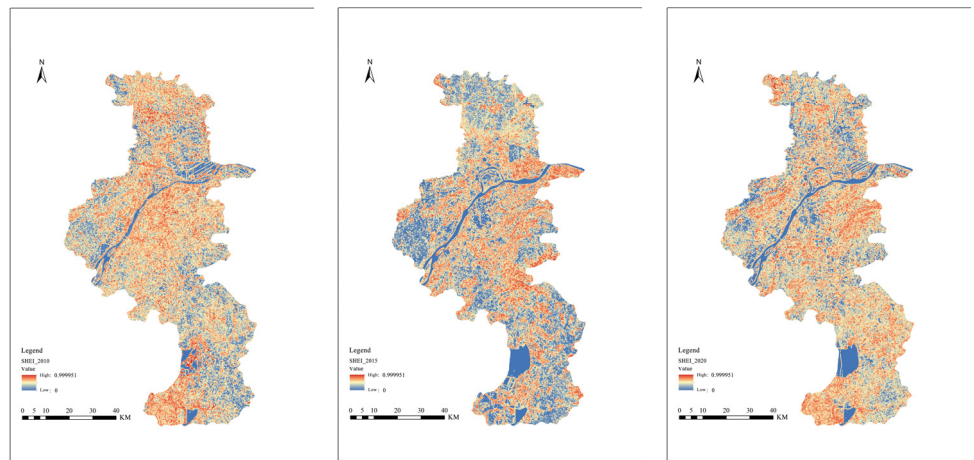

(f)

**Figure S1.** Spatial distribution of landscape pattern indexes in Nanjing for 2010, 2015, 2020 (a) PD, (b) LPI, (c) CONTAG, (d) SPLIT, (e) SHDI, (f) SHEI.
